# Supplementary material for: Factors Impacting Retention of Aged Care Workers: A Systematic Review
Source: MDPI journal article supplement (doi:10.3390/healthcare11233008), 2023-11-21
Supplement: s1 [file s1]

**Table S4.** Details of quantitative interventional studies

| Author                     | Sampling                                                                                                                                | Intervention<br><br>(Abbreviated TIDieR checklist)                                                                                                                                                                                                                                                                                                                                                                                                                                                                                                           | <sup>a</sup> Care support worker demographics                                                                                                                                                                                                                                            | Outcomes                                                                                                                      | Results                                                                                                                                                                                                                                                                                                                                                                                                                                                                                                                                                         |
|----------------------------|-----------------------------------------------------------------------------------------------------------------------------------------|--------------------------------------------------------------------------------------------------------------------------------------------------------------------------------------------------------------------------------------------------------------------------------------------------------------------------------------------------------------------------------------------------------------------------------------------------------------------------------------------------------------------------------------------------------------|------------------------------------------------------------------------------------------------------------------------------------------------------------------------------------------------------------------------------------------------------------------------------------------|-------------------------------------------------------------------------------------------------------------------------------|-----------------------------------------------------------------------------------------------------------------------------------------------------------------------------------------------------------------------------------------------------------------------------------------------------------------------------------------------------------------------------------------------------------------------------------------------------------------------------------------------------------------------------------------------------------------|
| Jeon (2015)[45]            | Convenience sampling from 45 sites within a single aged care organisation across both urban and rural areas. 24 sites randomly selected | <i>Name:</i> Clinical Leadership in Aged Care (CLiAC)<br><i>Why:</i> To develop leadership and management skills in middle managers<br><i>What:</i> 12-month leadership training program, incorporating action learning techniques, feedback, case scenarios and individual practice improvement projects<br><i>Who:</i> A facilitator with extensive nurse manager experience<br><i>How:</i> Individual meetings every four to six weeks, group discussions and workshops supplemented by learning resources<br>Control group: usual education and training | Gender: NR<br>Age: Intervention group 14% <35, 25% 35-44, 35% 45-54, 26% >55 years;<br>Control group 18% <35, 16% 35-44, 37% 45-54, 29% >55 years<br>Employed:<br>Intervention group 30% <3, 19% 3-5, 35% 5-10, 16% >10 years;<br>Control group 25% <3, 12% 3-5, 33% 5-10, 30% >10 years | Work environment<br>Care quality and safety<br>Work stress<br>Staff turnover rates<br>Staff stress level<br>Staff absenteeism | Work environment: Significant difference favouring intervention in greater supervisor support (0.61, 95% CI 0.04-1.18, $p=0.04$ ), perception of manager leadership style and behaviours (0.30, 95% CI 0.09-0.51, $p=0.005$ ) and leadership outcomes (0.35, 95% CI 0.13-0.56, $p=0.001$ )<br>Care and quality: No difference in care staff attitudes towards dementia care or person-centred care.<br>Staff turnover: No effect of the intervention ( $p=0.16$ )<br>Care staff job satisfaction, stress, and intention to leave: No effect of the intervention |
| Ericson-Lindman (2017)[46] | Random selection of a single RACF from 21 potential facilities in an urban area                                                         | <i>Name:</i> Not reported<br><i>Why:</i> To address stress of conscience in aged care staff<br><i>What:</i> Participatory action research intervention<br><i>Who:</i> Not reported<br><i>How:</i> 12 sessions of 90-minute duration with RN and NA participants together, using problem-based learning to learn how to constructively deal with issues of troubled conscience.                                                                                                                                                                               | Gender: 89% female<br>Age: 52 (7.4) years<br>Employed: 22 (7.6) years                                                                                                                                                                                                                    | Stress of conscience<br>Perception of conscience<br>Burnout<br>Social support                                                 | Perception of conscience: Significantly less agreement with "Our conscience warns us against hurting others" ( $p=0.04$ )<br>Social support: Significantly higher score "Are your work achievements appreciated by your immediate superior?" ( $p<0.001$ )<br>Stress of conscience and burnout: No significant difference                                                                                                                                                                                                                                       |
| O'Brien (2019)[47]         | Convenience sampling from "several" LTCFs in an urban area                                                                              | <i>Name:</i> Not reported<br><i>Why:</i> To understand the experience of care staff undergoing group therapy<br><i>What:</i> Acceptance and Commitment Therapy (ACT) focused on workplace                                                                                                                                                                                                                                                                                                                                                                    | Gender: 86% female<br>Age: 37.9 (13.2) years<br>Employed: 12 (9.9) years                                                                                                                                                                                                                 | Workplace injuries-days absent, frequency, injury complaint<br>Mental Health                                                  | Days missed due to injury: Significantly less days missed for treatment group at 1-month follow up, $F(1, 57) = 7.59$ , $p = 0.008$ , $n^2 = 0.12$                                                                                                                                                                                                                                                                                                                                                                                                              |

|                                                                                                                                                                                |                       |                                                                                                                                                                                                                                                                                                                                                                                                                      |
|--------------------------------------------------------------------------------------------------------------------------------------------------------------------------------|-----------------------|----------------------------------------------------------------------------------------------------------------------------------------------------------------------------------------------------------------------------------------------------------------------------------------------------------------------------------------------------------------------------------------------------------------------|
| challenges and stressors and methods to constructively deal with them<br><i>Who:</i> Not reported<br><i>How:</i> Two 2.5-h sessions of group-based therapy spaced 1 week apart | Group therapy process | Injury frequency or complaints: nil difference within or between-groups<br>Mental health: Significant reduction for treatment group in mental health symptoms $F(1, 28) = 9.28, p = 0.005$ .<br>Themes from process evaluation:<br>Mindfulness exercises an interesting way to reconceptualize challenges at work.<br>Group-based therapy well-received and encouraged greater team bonds through common experiences |
|--------------------------------------------------------------------------------------------------------------------------------------------------------------------------------|-----------------------|----------------------------------------------------------------------------------------------------------------------------------------------------------------------------------------------------------------------------------------------------------------------------------------------------------------------------------------------------------------------------------------------------------------------|

<sup>a</sup> Data presented as mean (SD) where possible, converted using standard calculations where required. ACA, aged care assistant; AIN, assistant in nursing; CA, care aide; CNA, certified nursing assistant; DCW, direct care workers; DON, director of nursing; LN, licensed nurse; HHA, home health aide; LTCF, long-term care facility; n/a, not applicable; NA, nurse assistant; NH, nursing home; NR, not reported; PCW, personal care worker; PSW, personal support worker; RACF, residential aged care facility; RN, registered nurse; SNF, skilled nursing facility
