# Supplementary material for: Factors Impacting Retention of Aged Care Workers: A Systematic Review
Source: MDPI journal article supplement (doi:10.3390/healthcare11233008), 2023-11-21
Supplement: s1 [file s1]

**Table S6.** Details of qualitative studies

| Author               | Sampling                                                                                            | Care support worker demographics                                                                                                                                | Data analysis     |
|----------------------|-----------------------------------------------------------------------------------------------------|-----------------------------------------------------------------------------------------------------------------------------------------------------------------|-------------------|
| Adebayo (2023) [55]  | Purposive sampling from RACFs, ethnic groups and multicultural support services across urban areas  | Gender: 75% female<br>Age: 25-45 years<br>Employed: 1-10 years                                                                                                  | Thematic analysis |
| Amateau (2023)[64]   | Convenience sampling to recruit nursing facilities and staff from urban, suburban, and rural areas  | Gender: 94% female<br>Age: 41.0 (12.6) years<br>Employed: 15 years                                                                                              | Thematic analysis |
| Bergqvist (2022)[76] | Purposive sampling from 318 NHs in single region                                                    | Gender: 95% female<br>Age: Average 51-60 years<br>Employed: >5 years                                                                                            | Thematic analysis |
| Booi (2021)[65]      | Purposive sampling from single LTCF in rural area                                                   | Gender: 84% female<br>Age: 42.0 (7.0) years<br>Employed: 9 (7.5) years                                                                                          | Thematic analysis |
| Cooke (2021)[87]     | Purposive sampling from two suburban LTCFs                                                          | Gender: 100% female<br>Age: 44.0 (10.5)<br>Employed: 10.6 years                                                                                                 | Thematic analysis |
| Creapeau (2022)[62]  | Purposive sampling from 59 urban and rural SNFs                                                     | Gender: CNAs 77% female<br>Age: CNAs 15% <22, 27% 23-30, 24% 31-40, 14% 41-50, 20% >51 years<br>Employed: CNAs 43% <2, 19% 2-3, 17% 4-7, 15% 8-20, 6% >21 years | Content analysis  |
| Dijxhoorn (2023)[89] | Nationwide convenience sampling                                                                     | Gender: 94% female<br>Age: 48.9 (11.4)<br>Employed: 29% <10, 24% 10-25, 47% >25 years                                                                           | Thematic analysis |
| Franzosa (2022)[77]  | Purposive sampling from 289 LTCFs                                                                   | Gender: CNAs 95% female<br>Age: 23% 20-39, 59% 40-59, 16% >60 years<br>Employed: 7% 0-3, 10% 3-5, 21% 5-10, 59% >10 years                                       | Content analysis  |
| Gleason (2016)[58]   | Purposive sampling from urban community aged care services                                          | Gender: 96% female<br>Age: 43.2 (9.7)<br>Employed: 7.9 (4.5) years                                                                                              | Content analysis  |
| Goel (2015)[56]      | Purposive sampling from 3 RACFs in a regional area                                                  | Gender: 100% female<br>Age: 30-55 years<br>Employed: 2-6 years                                                                                                  | Thematic analysis |
| Gray (2017)[69]      | Purposive sampling from four nursing facilities in single state in rural, suburban, and urban areas | Gender: 95% female<br>Age: 40.0 (9.5)<br>Employed: NR                                                                                                           | Thematic analysis |

|                             |                                                                                                               |                                                                                                                             |                                          |
|-----------------------------|---------------------------------------------------------------------------------------------------------------|-----------------------------------------------------------------------------------------------------------------------------|------------------------------------------|
| Hoedl (2022)[71]            | Purposive sampling from five urban and rural NHs                                                              | Gender: 78% female<br>Age: 41.0 (9.8)<br>Employed: 22% <5, 33% 5-10, 28% 11-20, 17% >20 years                               | Content analysis                         |
| Holmberg (2013)[66]         | Purposive sampling from seven NHs in single state                                                             | Gender: NR<br>Age: NR<br>Employed: NR                                                                                       | Thematic analysis                        |
| Krein (2022)[67]            | Purposive sampling from 13 facilities in single region                                                        | Gender: NR<br>Age: NR<br>Employed: 32% <1, 36% 1-5, 20% 6-10, 12% >11 years                                                 | Rapid analysis                           |
| Lim (2021)[59]              | Convenience sampling from care worker support service, drawing on both home care and residential care workers | Gender: 100% female<br>Age: 59.0 (8.0) years<br>Employed: 7 (2.6) years                                                     | Content analysis                         |
| Marziali (2015)[84]         | Purposive sampling from 17 rural and urban NHs                                                                | Gender: 92% female<br>Age: NR<br>Employed: 50% <5, 50% >5 years                                                             | Thematic analysis                        |
| Nichols (2015)[57]          | Purposive sampling from 6 facilities in single region                                                         | Gender: NR<br>Age: NR<br>Employed: NR                                                                                       | Thematic analysis                        |
| Roussillon-Soyer (2021)[68] | Snowball technique to select seven NHs in one region                                                          | Gender: 95% female<br>Age: NR<br>Employed: 6.2 years                                                                        | Thematic analysis                        |
| Senecal (2019)[86]          | Convenience sampling from six SNFs in single state                                                            | Gender: 90% female<br>Age: 38.0 (12.0) years<br>Employed: 30% < 6 months, 20% < 1 year, 30% at least 1 year, 20% 2-10 years | Framework analysis                       |
| Sousa-Ribeiro (2022)[79]    | Purposive sampling from single LTCF                                                                           | Gender: 87% female<br>Age: 55-61 years<br>Employed: 6-38 years                                                              | Interpretative phenomenological analysis |
| Titley (2022)[74]           | Convenience sampling from eight LTCFs across two regions                                                      | Gender: 94% female<br>Age: 26% <30-39, 35% 40-49, 24% 50-59, 14% >60 years<br>Employed: 10.3 (8) years                      | Content analysis                         |
| Winarnita (2022)[50]        | Purposive sampling from known social networks, employees at 7 RACFs                                           | Gender: 100% female<br>Age: 31-55 years<br>Employed: 1-10 years                                                             | Thematic analysis                        |

ACA, aged care assistant; CA, care aide; CNA, certified nursing assistant; DCW, direct care workers; DON, director of nursing; LN, licensed nurse; HHA, home health aide; LTCF, long-term care facility; Mod, moderate; n/a, not applicable; NA, nurse assistant; NH, nursing home; NR, not reported; PCW, personal care worker; PSW, personal support worker; RACF, residential aged care facility; RN, registered nurse; SNF, skilled nursing facility; US, United States
