# Supplementary material for: Factors Impacting Retention of Aged Care Workers: A Systematic Review
Source: MDPI journal article supplement (doi:10.3390/healthcare11233008), 2023-11-21
Supplement: s1 [file s1]

**Table S5.** Details of quantitative and mixed methods descriptive studies

| Author              | Sampling                                                                                                               | <sup>a</sup> Care support worker demographics                                                                                                                    | Outcomes                                                                                                                                                                              | Results                                                                                                                                                                                                                                                                                                                                                                                                                                                                                                                                                                                           |
|---------------------|------------------------------------------------------------------------------------------------------------------------|------------------------------------------------------------------------------------------------------------------------------------------------------------------|---------------------------------------------------------------------------------------------------------------------------------------------------------------------------------------|---------------------------------------------------------------------------------------------------------------------------------------------------------------------------------------------------------------------------------------------------------------------------------------------------------------------------------------------------------------------------------------------------------------------------------------------------------------------------------------------------------------------------------------------------------------------------------------------------|
| Berridge (2022)[81] | Nationwide purposive sampling from 2124 NHs who participated in a 2008-2009 survey that were still operational in 2016 | Gender: n/a<br>Age: n/a<br>Employed: n/a                                                                                                                         | Association of retention and leadership/staff empowerment and nursing home covariates-profit status, facility size, occupancy rate, nursing ratios and local competition for staffing | Leadership and staff empowerment score most significantly associated with NA retention, with RRR of retention 76% to 90% relative to 0% to 50% retention 2.81 (CI: 1.73-4.58).<br>Higher NH administrator turnover (3 or more in past year) was associated with lower NA retention (0%-50%, RRR = 0.62, CI:0.41-0.93).<br>Higher NH occupancy significantly associated with greater NA retention of 75% to 90% (RRR = 1.08, CI: 1.01-1.15)                                                                                                                                                        |
| Beynon (2022)[88]   | Purposive sampling from 4 NHs                                                                                          | Gender: 78% female<br>Age: 33 (13.52) years<br>Employed: 9 (8.8) years                                                                                           | Team collaboration<br>Experience of collaborating as pairs of nurses/CNAs                                                                                                             | From survey results (Aim 1), there was no significant difference across the facilities between LN and CNA perception of teamwork and collaboration and reflected a collaborative environment between staff with differing roles.<br>Exploration of lived work experience (Aim 2) identified five interconnected themes of perspective (attitudes participants bring to work), co-worker connection (getting to know colleagues as people), communication (sharing of ideas and observations), mutual support (helping each other) and “it makes a difference” (regarding impact of collaboration) |
| Brown (2016)[90]    | Convenience sampling from 11 US states with Green House NHs and comparison NHs with random selection of final yield    | Gender: Green House 91% female; NH 84% female<br>Age: Green House 38.8 (11.5); NH 37.2 (10.9) years<br>Employed: Green House 4.1 (4.6) years; NH 3.8 (3.8) years | Work stress<br>Safety culture<br>Staff satisfaction<br>Staff hours to resident ratios<br>Staff turnover                                                                               | Satisfaction (CNAs): Only significant difference related to difficulty of job in presence of absenteeism; GH 58.2%, NH 80.5%, $p<0.05$<br>Turnover (CNAs): No significant difference between sites; GH 47.4 (46.1), comparison NH 60.5 (28.7).<br>Safety culture, staff ratios and work stress no significant difference for CNAs between sites                                                                                                                                                                                                                                                   |
| Chang (2021)[70]    | Purposive sampling of all LTCFs in urban region                                                                        | Gender: 84% female<br>Age: 21% aged 30-39 years, 21% 40-49 years, 28% 50-59 years, 13% >60 years<br>Employed: 26% 5-10 years, 22% >10 years, average 7.5 years   | Job competency<br>Job satisfaction<br>Intention to stay                                                                                                                               | NA job competency had a direct positive effect on intrinsic satisfaction (point estimate 0.345, 95% CI 0.584, 0.715, $p<0.001$ ), and extrinsic job satisfaction (point estimate 0.488, 95% CI 0.410, 0.584, $p<0.001$ ) and a mediating effect on intention to stay via both intrinsic and extrinsic satisfaction ( $p<0.05$ )                                                                                                                                                                                                                                                                   |

|                         |                                                                    |                                                                                                                                                                                                                                                                                                                                                                                                                                |                                                                                                                                                                                               |                                                                                                                                                                                                                                                                                                                                                                                                                                                                                                      |
|-------------------------|--------------------------------------------------------------------|--------------------------------------------------------------------------------------------------------------------------------------------------------------------------------------------------------------------------------------------------------------------------------------------------------------------------------------------------------------------------------------------------------------------------------|-----------------------------------------------------------------------------------------------------------------------------------------------------------------------------------------------|------------------------------------------------------------------------------------------------------------------------------------------------------------------------------------------------------------------------------------------------------------------------------------------------------------------------------------------------------------------------------------------------------------------------------------------------------------------------------------------------------|
| Chao (2020)[80]         | Nationwide stratified equal probability sampling                   | Gender: "Younger" 77% female; "Older" 87% female<br>Age: "Younger" 36.15 (6.9), "Older" 54.42 (5.3) years<br>Employed: NR                                                                                                                                                                                                                                                                                                      | Personal characteristics<br>Organisational support<br>Work latitude<br>Selection, optimization, and compensation<br>Burnout<br>Intention to stay<br>Retention                                 | Older NAs reported significantly lower perceived support ( $t = 1.99$ , $p < 0.05$ ), less emotional exhaustion/burnout ( $t = 3.84$ , $p < 0.001$ ), increased ability to prioritize goals ( $t = -2.813$ , $p < 0.01$ ), greater personal accomplishment ( $t = -3.46$ , $p < 0.01$ ), and a higher intention to stay when income was higher ( $b = 0.19$ , $p < 0.05$ ).<br>Retention of older NAs was significantly influenced by work latitude, optimization strategy, and emotional exhaustion |
| Charlesworth (2020)[49] | Nationwide purposive sampling of all RACFs and home care providers | Gender: HCW Australian born 91.2% female, ESB 89.3% female, NESB 87.2% female; PCA Australian born 90.2%, ESB 91.8% female, NESB 80.3% female<br>Age: HCW Australian born 50.4 years, ESB 52.7 years, NESB 49.1 years; PCA Australian born 45.4 years, ESB 48.5 years, NESB 40.8 years<br>Employed: HCW Australian born 6.4 years, ESB 6.0 years, NESB 5.8 years; PCA Australian born 6.8 years, ESB 6.3 years, NESB 5.8 years | Personal characteristics<br>Years in Australia<br>Residency status<br>Highest post-school qualification<br>Employment contract<br>Length of tenure<br>Preferred hours                         | Migrant HCWs and PCAs are significantly more likely have a higher degree qualification ( $OR = 0.15$ , $p < 0.001$ ), be employed on casual contracts ( $OR = 18.15$ , $p < 0.001$ ), and desire more weekly hours of work than Australian-born peers ( $OR = 1.95$ , $p < 0.001$ ). Being from a NESB rather than a migrant from an ESB increased the odds of being in casual employment ( $OR = 0.96$ , $p < 0.001$ )                                                                              |
| Cheung (2018)[78]       | Nationwide convenience sampling with 365 NHs contacted             | Gender: 98% female<br>Age: 51.1 (9.6) years<br>Employed: 10.4 (6.4) years                                                                                                                                                                                                                                                                                                                                                      | Musculoskeletal symptoms<br>Perceived physical exertion<br>Response to work demands<br>Ergonomic and manual handling knowledge<br>Job content, satisfaction, and stress<br>Intention to leave | Prevalence of symptoms: 88.4% reporting at least one current musculoskeletal injury. This was significantly associated with female gender (98.5%, $p = 0.04$ ), perception of health status to be "not good" (49.4%, $p < 0.001$ ), greater work stress (72.4%, $p < 0.0001$ ) and intention to leave (37.3%, $p = 0.013$ ).                                                                                                                                                                         |
| Dhakal (2020)[85]       | Purposive sampling of 11 facilities in single                      | Gender: 89% female<br>Age: 54% > 40 years                                                                                                                                                                                                                                                                                                                                                                                      | Work environment<br>Intention to leave                                                                                                                                                        | Intention to leave significantly associated with casual workers, workers <39 years old, those working in metropolitan areas ( $p < 0.001$ ). Factors                                                                                                                                                                                                                                                                                                                                                 |

|                      |                                                                                                  |                                                                                                                                                                                                                          |                                                                                                                                   |                                                                                                                                                                                                                                                                                                                                                                                                                                                                                                                                                                                                                                                                                                                                                                                                                       |
|----------------------|--------------------------------------------------------------------------------------------------|--------------------------------------------------------------------------------------------------------------------------------------------------------------------------------------------------------------------------|-----------------------------------------------------------------------------------------------------------------------------------|-----------------------------------------------------------------------------------------------------------------------------------------------------------------------------------------------------------------------------------------------------------------------------------------------------------------------------------------------------------------------------------------------------------------------------------------------------------------------------------------------------------------------------------------------------------------------------------------------------------------------------------------------------------------------------------------------------------------------------------------------------------------------------------------------------------------------|
|                      | state from same organisation                                                                     | Employed: 33% < 2, 24% >11 years                                                                                                                                                                                         | Perceived attributes of ACAs                                                                                                      | affecting intention to leave included heavier workloads, limited teamwork, low staffing. Retention associated with pay rates, available working hours, promotion opportunities and job security                                                                                                                                                                                                                                                                                                                                                                                                                                                                                                                                                                                                                       |
| Dys (2022)[92]       | Stratified purposive sampling across rural and urban areas with 93 NHs contacted                 | Gender: 79% female<br>Age: DCW 35.7 (12.7) years<br>Employed: 5.5 (7.3) years                                                                                                                                            | Organisational characteristics<br>Person centred care practices<br>Job Satisfaction<br>Affective commitment<br>Intention to leave | No significant difference between DCWs and nurse intention to leave, job satisfaction, affective commitment, or perceptions of "knowing the person" and "comfort care."                                                                                                                                                                                                                                                                                                                                                                                                                                                                                                                                                                                                                                               |
| Graham (2012)[61]    | Purposive sampling from public list of all CNAs within a US state                                | Gender: 91% female<br>Age: 35 (12) years<br>Employed: 51% 1-5, 6% 6-10, 11% 11-15, 11% 16-20, 6% 21-25, 11% >25 years                                                                                                    | Prevalence of work-related injury<br>Work-tasks related to injury<br>Work-related manual handling training<br>Perception of work  | Injury prevalence: 46% reporting experience of work-related injury, 40% of these reported a back injury with 86% of these occurring when moving or lifting a patient.<br>Work experience: 69% reported injury had been in role > 5 years<br>Training: Those who reported "a whole lot of training, 5/5" accounted for 79% of those with back injury incidence<br>"Hardest part of job": Key themes identified as too many patients; not enough help to care for patients; and poor relationships between nurses and CNAs                                                                                                                                                                                                                                                                                              |
| Isherwood (2017)[54] | Nationwide purposive sampling of all RACFs and home care providers                               | Gender: PCA Australian born 90.2%, ESB 91.8% female, NESB 80.3% female<br>Age: PCA Australian born 45.4 years, ESB 48.5 years, NESB 40.8 years<br>Employed: PCA Australian born 6.8 years, ESB 6.3 years, NESB 5.8 years | Socio-demographic<br>Work arrangements<br>Job satisfaction<br>Retention and intention to leave                                    | South-East Asian-born migrant care workers found to have significantly higher rates of Bachelor degree qualification (35.6%, $p<0.001$ ) than locally born peers (2.4%). North-east Asian migrant workers reported significantly higher levels of an expectation to work longer than scheduled hours (21.6%, $p<0.001$ ) compared to locally born peers (11.4%). Asian-born care workers reported higher job satisfaction across all areas including respect from others, total pay, development opportunities and time with care recipients than local-born peers ( $p<0.001$ ). South-east Asian born employees were more likely to be actively looking for new employment (13.3%, $p<0.001$ ) however intention to leave over the next three years was not different between any Asian born or locally born groups |
| Keisu (2018)[93]     | Purposive sampling from respondents to previous survey in urban and rural areas, nine workplaces | Gender: n/a<br>Age: n/a<br>Employed: n/a                                                                                                                                                                                 | Effort and reward<br>Transformational leadership                                                                                  | NAs reported significantly greater effort scores 18.7 (5.2), $p<0.001$ ). No significant difference in reward scores between NAs and professionals. Professionals scored significantly higher on positive assessment of managers being transformational leaders (25.4% vs 13.5%, $p=0.026$ ) and charismatic role models (36% vs 9%, $p=0.001$ )                                                                                                                                                                                                                                                                                                                                                                                                                                                                      |

|                     |                                                                                                                    |                                                                                                          |                                                                                                                                         |                                                                                                                                                                                                                                                                                                                                                                                                                                                                                                                                                                                                                                                                                     |
|---------------------|--------------------------------------------------------------------------------------------------------------------|----------------------------------------------------------------------------------------------------------|-----------------------------------------------------------------------------------------------------------------------------------------|-------------------------------------------------------------------------------------------------------------------------------------------------------------------------------------------------------------------------------------------------------------------------------------------------------------------------------------------------------------------------------------------------------------------------------------------------------------------------------------------------------------------------------------------------------------------------------------------------------------------------------------------------------------------------------------|
|                     | strategically selected from 132                                                                                    |                                                                                                          |                                                                                                                                         |                                                                                                                                                                                                                                                                                                                                                                                                                                                                                                                                                                                                                                                                                     |
| Kennedy (2020)[82]  | Purposive sampling from 835 NHs with complete retention and turnover data from a single US state (rural and urban) | Gender: n/a<br>Age: n/a<br>Employed: n/a                                                                 | Turnover<br>Retention<br>Covariates including organisational structure, resident case mix, financial resources, staffing and management | Average CNA turnover 54.7%; average CNA retention rate 63.8%.<br>Turnover and retention significantly negatively correlated (Pearson correlation, $r = -0.26, p < 0.001$ ).<br>Higher CNA turnover associated with for-profit ownership status ( $b=6.83$ (3.08), $p < 0.05$ ), higher DON turnover ( $b=8.28$ (3.64), $p < 0.05$ ), higher proportion of residents with psychiatric illness ( $b=0.18, p < 0.01$ ) and low local unemployment rates ( $b=-3.81$ (1.46), $p < 0.05$ )                                                                                                                                                                                               |
| Leskovic (2020)[91] | Purposive sampling from 86 NH in 2013 and 98 NH in 2020 from rural areas                                           | Gender: 96% female<br>Age: 40.8 (9.6) years<br>Employed: NR                                              | Burnout<br>Job satisfaction<br>Experience of occupational changes during the pandemic (2020 only)                                       | Burnout: Significantly greater emotional exhaustion ( $p < 0.001$ ) and significantly less personal accomplishment ( $p < 0.001$ ) in 2020 than 2013.<br>Satisfaction: Significantly less intrinsic ( $p=0.01$ ), extrinsic ( $p=0.004$ ) and overall satisfaction ( $p=0.028$ ) in 2020 than 2013.<br>Experience of working during a pandemic: Themes included consistent experience of physical, emotional, cognitive, and behavioural burnout, however greater engagement with co-workers and residents. Job satisfaction was negatively impacted by direct work environment changes to work hours and lack of breaks, but was bolstered by a sense of cooperation between staff |
| Liang (2014)[52]    | Proportional stratified random sampling of LTCFs                                                                   | Gender: NR<br>Age: 43.1 (10.9) years<br>Employed: NR                                                     | Job stress<br>Health-related quality of life                                                                                            | Physical quality of life significantly positively associated with longer shift length (12 hours vs 8 hours ( $t=2.650, p < 0.01$ ) and negatively associated with higher psychological demand ( $t= -5.699, p < 0.01$ ).<br>Mental quality of life significantly positively associated with increased worker age ( $t=3.525, p < 0.01$ ), smaller institution size ( $t=2.802, p < 0.01$ ), and increased job control ( $t=3.460, p < 0.01$ ) and significantly negatively associated with ( $t= -4.496, p < 0.01$ )                                                                                                                                                                |
| Lin (2021)[60]      | Convenience sampling from 12 LTCFs across a region                                                                 | Gender: 87% female<br>Age: 30% <50, 33% 51-55, 37% >55 years<br>Employed: 33% 1-2, 35% 3-5, 31% >6 years | Socio-demographics<br>Work experience<br>Training<br>Intention to leave<br>Supportive supervision                                       | Increased years of working as a PSW, nurse supervisor gender (female), higher education, increased number of years in nursing, presence of nurse management training and higher RN/PSW ratio all positively significantly influenced the level of supportive supervision reported by the PSWs (all $p < 0.05$ ).                                                                                                                                                                                                                                                                                                                                                                    |
| Matthews (2018)[94] | Purposive sampling from 22 LTCFs across single state                                                               | Gender: n/a<br>Age: n/a<br>Employed: n/a                                                                 | Employee perceptions of leadership<br>Turnover<br>Job satisfaction<br>Time spent with supervisor                                        | Retained employees had significantly greater loyalty, affect, respect and contribution for their supervisor than staff who had turned over (all $p < 0.001$ ). There was no significant difference between retained or staff who had turned over with relation to job satisfaction, age or hours interacting with supervisor per week.                                                                                                                                                                                                                                                                                                                                              |

|                               |                                                 |                                                                                              |                                                                                                                                                                                                   |                                                                                                                                                                                                                                                                                                                                                                                                                                                                                                                                                |
|-------------------------------|-------------------------------------------------|----------------------------------------------------------------------------------------------|---------------------------------------------------------------------------------------------------------------------------------------------------------------------------------------------------|------------------------------------------------------------------------------------------------------------------------------------------------------------------------------------------------------------------------------------------------------------------------------------------------------------------------------------------------------------------------------------------------------------------------------------------------------------------------------------------------------------------------------------------------|
|                               |                                                 |                                                                                              |                                                                                                                                                                                                   | When controlling for job satisfaction, age, gender, and time interacting with supervisor, only supervisor loyalty was significantly associated with staff turnover (pseudo $R^2=0.16$ , $p<0.01$ )                                                                                                                                                                                                                                                                                                                                             |
| Rodríguez-Monforte (2020)[73] | Purposive sampling from 364 facilities          | Gender: 94% female<br>Age: 45.3 (10.4) years<br>Employed: 7.6 (6.7) years                    | Job satisfaction<br>Work empowerment<br>Work effectiveness<br>Work stress<br>Supervisory support                                                                                                  | Job satisfaction of NAs was significantly negatively associated with stress from resident behaviour ( $b=-0.20$ 95%CI -0.32, -0.07, $p<0.01$ ), lower supervisory support ( $b=0.16$ 95%CI 0.12, -0.21, $p<0.01$ ), lower work effectiveness ( $b=0.14$ 95%CI 0.10, 0.18, $p<0.01$ ) and lower work empowerment ( $b=-0.22$ 95%CI 0.14, 0.29, $p<0.01$ )                                                                                                                                                                                       |
| Rodwell (2015)[83]            | Convenience sampling                            | Gender: 86% female<br>Age: >58% older than 50 years<br>Employed: 50% < 1 year, 38% 1-4 years | Workplace bullying<br>Workplace violence<br>Job demand<br>Social support<br>Negative affectivity                                                                                                  | Experiencing bullying by CNAs was significantly positively related to higher negative affect (0.36, $p<0.05$ ), working part-time compared to casually (3.35, $p<0.01$ ) and lower outside social support (0.35, $p<0.05$ ). Higher workload was significantly positively associated with higher physical assaults from resident's families (external abuse) (0.09, $p<0.05$ ), and increased age of worker was associated with significantly less reports of assault (-2.47, $p<0.001$ ) or threat (-1.2, $p<0.05$ ) from resident's families |
| Sharma (2022)[48]             | Purposive sampling of 439 NHs from single state | Gender: n/a<br>Age: n/a<br><br>Employed: n/a                                                 | Turnover<br>Average hourly wage<br>Resident and facility characteristics                                                                                                                          | Higher wages significantly associated with lower turnover of CNA staff and this was more prominent in for-profit facilities. Covariates of occupancy, age, ethnicity, or gender of residents, staffing hours per day, local unemployment rates or facility location did not affect turnover rates of CNAs in this analysis                                                                                                                                                                                                                     |
| Stevens (2022)[51]            | Purposive sampling from 83 NHs in urban region  | Gender: 96% female<br>Age: 45.4 (10.5)<br>Employed: NR                                       | Quantitative work demands<br>Psychosocial work environment<br>Step rates per hour<br>Observations of direct care tasks                                                                            | Lower perceived quantitative demands at work were associated with being a migrant (-6.5, 95%CI -11.0, -2.0, $p=0.006$ ), being a care helper compared to care aide (-8.1, 95%CI -11.9, -4.1, $p<0.001$ ), working a fixed evening (-16.6, 95%CI -24.7, -8.6, $p<0.001$ ), or evening/night shift (-22.7, 95%CI -41.4, -3.7 $p=0.021$ ), having less emotional demands at work (0.3, 95%CI 0.2, 0.4, $p<0.001$ ), and having less influence at work (-0.2, 95%CI -0.3, -0.1, $p<0.001$ )                                                        |
| Wallin (2012)[72]             | Purposive sampling across three urban districts | Gender: 86% female<br>Age: 44.1 (11.0) years<br>Employed: 16.5 (9.8) years                   | General job satisfaction<br>Satisfaction with nursing-care provision<br>Health complaints<br>Sense of coherence<br>Personalised care<br>Work climate<br>Quality of care<br>Leadership and support | General job satisfaction was significantly negatively associated with NAs reporting health complaints, and significantly positively associated with the caring climate and personalised care provision. Nursing-care satisfaction was significantly positively associated with married NAs, those working day shifts, and the caring climate and personalised care provision                                                                                                                                                                   |

|                     |                                                             |                                                                         |                                                                                       |                                                                                                                                                                                                                                                                                                                                                                                                                                                    |
|---------------------|-------------------------------------------------------------|-------------------------------------------------------------------------|---------------------------------------------------------------------------------------|----------------------------------------------------------------------------------------------------------------------------------------------------------------------------------------------------------------------------------------------------------------------------------------------------------------------------------------------------------------------------------------------------------------------------------------------------|
| Yang<br>(2021)[53]  | Purposive sampling<br>from across urban and<br>rural areas  | Gender: 90% female<br>Age: 44 (13.6) years<br>Employed: 6.5 (5.9) years | Job content<br>Musculoskeletal pain                                                   | Job control and social support were significantly negatively associated with musculoskeletal pain ( $p<0.001$ ), with lower social support correlating with the more severe pain of the NA ( $p<0.001$ ). Pain scores were significantly higher for NAs with chronic disease, those without exercise habits, those without rest time at work, those who didn't use assistive devices, those who were migrants and those of older age ( $p<0.001$ ) |
| Zhang<br>(2016)[75] | Convenience sampling<br>from 15 non-unionised<br>facilities | Gender: 93% female<br>Age: 40.5 (13.7) years<br>Employed: NR            | Mental health<br>Work-family conflict<br>Sleep quantity/quality<br>Working conditions | Higher levels of work-family conflict were significantly positively correlated with lower mental health scores ( $Rho = -0.16, p<.01$ ), increased physical demands, psychological demands, and weekly work hours ( $p<.05$ ). Decision latitude, social support, and shift length were significantly negatively correlated with work-family conflict ( $p<.05$ )                                                                                  |

<sup>a</sup> Data presented as mean (SD) where possible, converted using standard calculations where required. ACA, aged care assistant; CA, care aide; CNA, certified nursing assistant; DCW, direct care workers; DON, director of nursing; ESB, English speaking background; HCW, home care worker; HHA, home health aide; LN, licensed nurse; LTCF, long-term care facility; n/a, not applicable; NA, nurse assistant; NESB, non-English speaking background; NH, nursing home; NR, not reported; PCW, personal care worker; PSW, personal support worker; RACF, residential aged care facility; RN, registered nurse; RRR, relative risk ratio; SNF, skilled nursing facility
