# Supplementary material for: Factors Impacting Retention of Aged Care Workers: A Systematic Review
Source: MDPI journal article supplement (doi:10.3390/healthcare11233008), 2023-11-21
Supplement: s1 [file s1]

**Table S3.** Medline search strategy

| Search ID# | Search Terms                                             | Search Notes |
|------------|----------------------------------------------------------|--------------|
| S1         | "nurs* assistan*".mp.                                    |              |
| S2         | "nurs* aide*".mp.                                        |              |
| S3         | "personal care*".mp.                                     |              |
| S4         | "disability support".mp.                                 |              |
| S5         | "frontline care*".mp.                                    |              |
| S6         | "geriatric nurs*".mp.                                    |              |
| S7         | "care support work*".mp.                                 |              |
| S8         | Geriatric Nursing/                                       | MeSH term    |
| S9         | "Hospice and Palliative Care Nursing"/                   | MeSH term    |
| S10        | Nursing Assistants/                                      | MeSH term    |
| S11        | 1 or 2 or 3 or 4 or 5 or 6 or 7 or 8 or 9 or 10          |              |
| S12        | "nursing home*".mp.                                      |              |
| S13        | "long-term care".mp.                                     |              |
| S14        | "hospice*".mp.                                           |              |
| S15        | "residential facilit*".mp.                               |              |
| S16        | "homes for the aged".mp.                                 |              |
| S17        | "assisted living".mp.                                    |              |
| S18        | "aged care".mp.                                          |              |
| S19        | "home-based care".mp.                                    |              |
| S20        | Homes for the Aged/                                      |              |
| S21        | Nursing Homes/                                           | MeSH term    |
| S22        | 12 or 13 or 14 or 15 or 16 or 17 or 18 or 19 or 20 or 21 |              |
| S24        | S11 and 22                                               |              |

|     |                                                          |  |
|-----|----------------------------------------------------------|--|
| S25 | "barrier*".mp.                                           |  |
| S26 | "facilitator*".mp.                                       |  |
| S27 | "job satisfaction".mp.                                   |  |
| S28 | "attitude*".mp.                                          |  |
| S29 | "recruitment".mp.                                        |  |
| S30 | "retention".mp.                                          |  |
| S31 | "professional development".mp.                           |  |
| S32 | "motivation".mp.                                         |  |
| S33 | "challenge*".mp.                                         |  |
| S34 | "employment".mp.                                         |  |
| S35 | 25 or 26 or 27 or 28 or 29 or 30 or 31 or 32 or 33 or 34 |  |
| S36 | 12 and 23 and 35                                         |  |
| S37 | limit 36 to yr="2012 -Current"                           |  |

[mp=title, book title, abstract, original title, name of substance word, subject heading word, floating sub-heading word, keyword heading word, organism supplementary concept word, protocol supplementary concept word, rare disease supplementary concept word, unique identifier, synonyms, population supplementary concept word, anatomy supplementary concept word]
