# Supplementary material for: Factors Impacting Retention of Aged Care Workers: A Systematic Review
Source: MDPI journal article supplement (doi:10.3390/healthcare11233008), 2023-11-21
Supplement: s1 [file s1]

**Table S2.** Enhancing transparency in reporting the synthesis of qualitative research: the ENTREQ statement

| No | Item                       | Description                                                                                                                       | Examples/location in manuscript                             |
|----|----------------------------|-----------------------------------------------------------------------------------------------------------------------------------|-------------------------------------------------------------|
| 1  | Aim                        | What research question does the synthesis address?                                                                                | Barriers and facilitators to retention of aged care workers |
| 2  | Synthesis methodology      | What synthesis methodology or theoretical framework underpins the synthesis? Is a rationale for choice of method provided?        | JB1 mixed methods review methodology                        |
| 3  | Approach to searching      | Was the search pre-planned or iterative?                                                                                          | pre-planned                                                 |
| 4  | Inclusion criteria         | Were inclusion/exclusion criteria provided                                                                                        | Table 1                                                     |
| 5  | Data sources               | Are all the information sources and the date of searches stated? Is a rationale provided?                                         | Section 2.1                                                 |
| 6  | Electronic search strategy | Were details of a search strategy provided?                                                                                       | Table S3                                                    |
| 7  | Study screening methods    | Were the study screening and sifting process described?                                                                           | Section 2.2                                                 |
| 8  | Study characteristics      | Were the characteristics of the included studies presented?                                                                       | Table 2 and tables S4-S6                                    |
| 9  | Study selection results    | Numbers of studies screened and reasons for exclusion indicated in a figure/flowchart                                             | Figure 1 PRISMA flowchart                                   |
| 10 | Rationale for appraisal    | What was the rationale and approach used to appraise the included studies or selected findings?                                   | Section 2.3                                                 |
| 11 | Appraisal items            | What tools, frameworks and criteria were used to appraise the studies or selected findings?                                       | Section 2.3                                                 |
| 12 | Appraisal process          | Who conducted the appraisal?                                                                                                      | Section 2.3                                                 |
| 13 | Appraisal results          | Were the results of the quality assessment presented? Were articles weighted/excluded based on assessment and was this justified? | Table 1; section 2.3                                        |
| 14 | Data extraction            | How were the data extracted from the primary studies?                                                                             | Section 2.4                                                 |
| 15 | Software                   | What computer software, if applicable, was used?                                                                                  | Section 2.4                                                 |
| 16 | Number of reviewers        | Who was involved in coding and analysis?                                                                                          | Section 2.4                                                 |
| 17 | Coding                     | Was the process for coding of data reported?                                                                                      | Section 2.4                                                 |
| 18 | Study comparison           | How were comparisons made within and across studies?                                                                              | Section 2.4                                                 |
| 19 | Derivation of themes       | How were the themes or constructs derived?                                                                                        | Section 2.4, section 3.4                                    |

|    |                  |                                                                                                                  |                           |
|----|------------------|------------------------------------------------------------------------------------------------------------------|---------------------------|
| 20 | Quotations       | Were quotations from the primary studies provided to illustrate themes/constructs?                               | No                        |
| 21 | Synthesis output | Did the synthesis generate rich, compelling and useful output that went beyond a summary of the primary studies? | Section 3.5-3.8, Figure 2 |
