# Supplementary material for: Factors Impacting Retention of Aged Care Workers: A Systematic Review
Source: MDPI journal article supplement (doi:10.3390/healthcare11233008), 2023-11-21
Supplement: s1 [file s1]

Supplementary table S8\_ Reasons for exclusion at full text review

| Study            | Title                                                                                                                              | Notes                                                                                            |
|------------------|------------------------------------------------------------------------------------------------------------------------------------|--------------------------------------------------------------------------------------------------|
| Agosti 2015      | Shift work to balance everyday life - a salutogenic nursing perspective in home help service in Sweden                             | Exclusion reason: Not including aged care support workers;                                       |
| Ahlin 2013       | Longitudinal relationships between stress of conscience and concepts of importance                                                 | Exclusion reason: Outcomes not related to recruitment or retention of aged care support workers; |
| Amateau 2022     | Stress, strength, and respect: Viewing direct care staff experiences through a trauma-informed lens                                | duplicate                                                                                        |
| Assis 2020       | Training Program for Care Professionals in Nursing Homes: Effectiveness and Feasibility                                            | Exclusion reason: Outcomes not related to recruitment or retention of aged care support workers; |
| Backhouse 2022   | Home-care workers' experiences of assisting people with dementia with their personal care: A qualitative interview study           | Exclusion reason: Outcomes not related to recruitment or retention of aged care support workers; |
| Beck 2015        | Applying a palliative care approach in residential care: effects on nurse assistants' work situation                               | Exclusion reason: Data from pre-2012;                                                            |
| Beck 2012        | Having to focus on doing rather than being- nurse assistants' experience of palliative care in municipal residential care settings | Exclusion reason: Data from pre-2012;                                                            |
| Bissoondial 2014 | Job satisfaction and its relationship on retention: A study of long-term care nurses in Ontario, Canada                            | Exclusion reason: Conference proceedings, dissertation;                                          |
| Boerner 2015     | Grief after patient death: direct care staff in nursing homes and homecare                                                         | Exclusion reason: Outcomes not related to recruitment or retention of aged care support workers; |
| Bolt 2020        | Nursing Staff Needs in Providing Palliative Care for Persons With Dementia at Home or in Nursing Homes: A Survey                   | Exclusion reason: Data not separating aged care support worker outcomes;                         |
| Brady 2016       | An exploration of nursing assistants' perceptions about job satisfaction                                                           | Exclusion reason: Non research paper                                                             |
| Butler 2012      | Older Women Caring for Older Women: The Rewards and Challenges of the Home Care Aide Job                                           | Exclusion reason: Data from pre-2012;                                                            |
| Carter 2013      | Sleep disturbance, chronic stress, and depression in hospice nurses: testing the feasibility of an intervention                    | Exclusion reason: Not residential or home based aged care setting;                               |
| Champion 2017    | What support do nurses need to provide palliative care for people with dementia?                                                   | Exclusion reason: Not residential or home based aged care setting;                               |
| Cheloni 2019     | Working with older people with dementia: motivations and demotivations among health carers                                         | Exclusion reason: Not residential or home based aged care setting;                               |

|                   |                                                                                                                                       |                                                                                                  |
|-------------------|---------------------------------------------------------------------------------------------------------------------------------------|--------------------------------------------------------------------------------------------------|
| Cheong 2021       | Developing and Evaluating a Continuous Education Program for Healthcare Assistants in Macao: A Cluster-Randomized Trial               | Exclusion reason: Outcomes not related to recruitment or retention of aged care support workers; |
| Choi 2021         | Person-Centered Care Environment Associated With Care Staff Outcomes in Long-Term Care Facilities                                     | Exclusion reason: Data not separating aged care support worker outcomes;                         |
| CouletduGard 2021 | Perceptions of job factors that impact intent to leave among CNAS in LTC facilities in Delaware                                       | Exclusion reason: Conference proceedings, dissertation;                                          |
| Dhaini 2017       | Are nursing home care workers' health and presenteeism associated with implicit rationing of care? A cross-sectional multi-site study | Exclusion reason: Outcomes not related to recruitment or retention of aged care support workers; |
| Dobbs 2018        | Certified nursing assistants' perspectives of the CARES activities of daily living dementia care program                              | Exclusion reason: Outcomes not related to recruitment or retention of aged care support workers; |
| Dobbs 2018        | Certified nursing assistants' perspectives of the CARES R activities of daily living dementia care program                            | Exclusion reason: Duplicate;                                                                     |
| Dominguez 2022    | Retention of nursing assistants in assisted living using stay interviews: A qualitative case study                                    | Exclusion reason: Conference proceedings, dissertation;                                          |
| Duan 2020         | Care Aides Working Multiple Jobs: Considerations for Staffing Policies in Long-Term Care Homes During and After the COVID-19 Pandemic | Exclusion reason: Non research paper ;                                                           |
| Ewalt 2016        | Is Empowerment Related to Certified Nursing Assistant Job Satisfaction? A Cross-Sectional Study                                       | Exclusion reason: Full text not available;                                                       |
| Finn 2018         | The Role of Empathy in Nursing Assistant Retention                                                                                    | Exclusion reason: Conference proceedings, dissertation;                                          |
| Gallardo 2018     | Personality predictors of compassion fatigue in long-term care environments                                                           | Exclusion reason: Data not separating aged care support worker outcomes;                         |
| Gosseries 2012    | Burnout in healthcare workers managing chronic patients with disorders of consciousness                                               | Exclusion reason: Not residential or home based aged care setting;                               |
| Hanson 2023       | Comfort First: Development and pilot testing of a web-based video training to disseminate Comfort Matters dementia care               | Exclusion reason: Outcomes not related to recruitment or retention of aged care support workers; |
| Harrad 2018       | Factors associated with and impact of burnout in nursing and residential home care workers for the elderly                            | Exclusion reason: Non research paper ;                                                           |
| Hart 2020         | Scheduling longer working lives for older aged care workers: A time and income capability approach                                    | Exclusion reason: Data not separating aged care support worker outcomes;                         |
| Henry 2015        | The effects of certified nurse assistants' socialization, onboarding, and turnover                                                    | Exclusion reason: Conference proceedings, dissertation;                                          |

|                   |                                                                                                                                                        |                                                                                                  |
|-------------------|--------------------------------------------------------------------------------------------------------------------------------------------------------|--------------------------------------------------------------------------------------------------|
| Holmsen 2023      | Professional caregivers' participation in the International Caregiver Development Programme: A qualitative study of psychosocial care in nursing homes | Exclusion reason: Outcomes not related to recruitment or retention of aged care support workers; |
| Hurtado 2012      | Racial disparities in job strain among American and immigrant long-term care workers                                                                   | Exclusion reason: Data from pre-2012;                                                            |
| Jungyoon 2014     | The joint relationship between organizational design factors and HR practice factors on direct care workers' job satisfaction and turnover intent      | Exclusion reason: Data from pre-2012;                                                            |
| Knopp&Sihota 2015 | Factors associated with rushed and missed resident care in western Canadian nursing homes: a cross-sectional survey of health care aides               | Exclusion reason: Data from pre-2012;                                                            |
| Ko 2012           | Aggression Exhibited by Older Dementia Clients Toward Staff in Japanese Long-Term Care                                                                 | Exclusion reason: Data from pre-2012;                                                            |
| Lachs 2012        | The epidemiology of physically and verbally aggressive behaviors of nursing home residents directed at staff                                           | Exclusion reason: Conference proceedings, dissertation;                                          |
| Lange 2013        | The ELDER expansion project: building cultural competence among long term home care workers                                                            | Exclusion reason: Outcomes not related to recruitment or retention of aged care support workers; |
| Lee 2013          | Attitudes of long-term care staff toward dementia and their related factors                                                                            | Exclusion reason: Data from pre-2012;                                                            |
| Long 2019         | Exploring Certified Nurse Aide Perspectives on Caring for Residents With Dementia                                                                      | Exclusion reason: Non research paper ;                                                           |
| Long 2018         | Echo-chicago geriatrics SNF: A pilot direct care workforce education initiative                                                                        | Exclusion reason: Conference proceedings, dissertation;                                          |
| Lucchetti 2014    | Nursing home care: Exploring the role of religiousness in the mental health, quality of life and stress of formal caregivers                           | Exclusion reason: Data from pre-2012;                                                            |
| Mager 2016        | The ELDER Project                                                                                                                                      | Exclusion reason: Data not separating aged care support worker outcomes;                         |
| Midje 2021        | Exploring work engagement in the context of person-centred practices: a qualitative study in municipal long-term care facilities for older people      | Exclusion reason: Data not separating aged care support worker outcomes;                         |
| Midje 2022        | The role of working environment and employee engagement in person-centred processes for older adults in long-term care services                        | Exclusion reason: Data not separating aged care support worker outcomes                          |
| Miranda 2014      | Musculoskeletal pain and reported workplace assault: a prospective study of clinical staff in nursing homes                                            | Exclusion reason: Data not separating aged care support worker outcomes;                         |

|                    |                                                                                                                                                     |                                                                                                  |
|--------------------|-----------------------------------------------------------------------------------------------------------------------------------------------------|--------------------------------------------------------------------------------------------------|
| Mountford 2013     | I'll take care of you: The use of supportive work practices to retain older workers                                                                 | Exclusion reason: Non research paper ;                                                           |
| Novek 2013         | Filipino Health Care Aides and the Nursing Home Labour Market in Winnipeg                                                                           | Exclusion reason: Data from pre-2012;                                                            |
| OrrungWallin 2015  | Job strain and stress of conscience among nurse assistants working in residential care                                                              | Exclusion reason: Data from pre-2012;                                                            |
| Pelissier 2015     | Impaired mental well-being and psychosocial risk: a cross-sectional study in female nursing home direct staff                                       | Exclusion reason: Data from pre-2012;                                                            |
| Phua 2023          | Educational needs of nursing home staff: does a needs-based palliative care course make a difference?                                               | Exclusion reason: Outcomes not related to recruitment or retention of aged care support workers; |
| Pinto 2021         | The impact of Covid-19 on certified nursing assistants in New York City: A cross-sectional study                                                    | Exclusion reason: Conference proceedings, dissertation;                                          |
| Quach 2021         | Relationship Between Work Experience and Safety Climate in Veterans Affairs Nursing Homes Nationwide                                                | Exclusion reason: Outcomes not related to recruitment or retention of aged care support workers; |
| Rashik 2023        | Have Nursing Assistant Stressors Changed Following COVID- 19?                                                                                       | Exclusion reason: Conference proceedings, dissertation;                                          |
| Rasmussen 2015     | A multifaceted workplace intervention for low back pain in nurses' aides: a pragmatic stepped wedge cluster randomised controlled trial             | Exclusion reason: Data not separating aged care support worker outcomes                          |
| Rodriguez 2013     | A brief educational intervention to improve staff management of disruptive behaviors in the nursing home                                            | Exclusion reason: Conference proceedings, dissertation;                                          |
| Rodwell 2014       | Addressing workplace violence among nurses who care for the elderly                                                                                 | Exclusion reason: Data not separating aged care support worker outcomes;                         |
| Sarabia-Cobo 2021  | Burnout, Compassion Fatigue and Psychological Flexibility among Geriatric Nurses: A Multicenter Study in Spain                                      | Exclusion reason: Data not separating aged care support worker outcomes;                         |
| Sarabia-Cobo 2021  | Experiences of geriatric nurses in nursing home settings across four countries in the face of the COVID-19 pandemic                                 | Exclusion reason: Data not separating aged care support worker outcomes;                         |
| Schenck 2019       | Efforts and challenges in retaining staff in a rural nursing home                                                                                   | Exclusion reason: Conference proceedings, dissertation;                                          |
| Schmidt 2013       | Job demands and personal resources in their relations to indicators of job strain among nurses for older people                                     | Exclusion reason: Data not separating aged care support worker outcomes;                         |
| Schulze 2022       | Psychosocial burden in nurses working in nursing homes during the Covid-19 pandemic: a cross-sectional study with quantitative and qualitative data | Exclusion reason: Data not separating aged care support worker outcomes;                         |
| Schwendiman n 2016 | Factors associated with high job satisfaction among care workers in Swiss nursing homes - a cross sectional survey study                            | Exclusion reason: Data not separating aged care support worker outcomes;                         |

|                     |                                                                                                                                                                                       |                                                                                                  |
|---------------------|---------------------------------------------------------------------------------------------------------------------------------------------------------------------------------------|--------------------------------------------------------------------------------------------------|
| Senecal 2020        | State Tested Nursing Assistants' Workplace Experiences That Threaten or Support Intent to Stay                                                                                        | Exclusion reason: Duplicate;                                                                     |
| Shin 2014           | Nursing Staffing and Quality of Life in Western New York Nursing Homes                                                                                                                | Exclusion reason: Outcomes not related to recruitment or retention of aged care support workers; |
| Snyder 2021         | A qualitative assessment of factors affecting nursing home caregiving staff experiences during the COVID-19 pandemic                                                                  | Exclusion reason: Data not separating aged care support worker outcomes;                         |
| Soyer 2021          | The demotivating impact of absenteeism in nursing homes                                                                                                                               | Exclusion reason: Duplicate;                                                                     |
| Stutte 2017         | Factors associated with aggressive behavior between residents and staff in nursing homes                                                                                              | Exclusion reason: Data not separating aged care support worker outcomes;                         |
| Temkin-Greener 2020 | Nursing Home Staff Turnover and Perceived Patient Safety Culture: Results from a National Survey                                                                                      | Exclusion reason: Outcomes not related to recruitment or retention of aged care support workers; |
| Trinkoff 2013       | Turnover, staffing, skill mix, and resident outcomes in a national sample of US nursing homes                                                                                         | Exclusion reason: Data from pre-2012;                                                            |
| Tufte 2012          | Client-related work tasks and meaning of work: Results from a longitudinal study among eldercare workers in Denmark                                                                   | Exclusion reason: Data from pre-2012;                                                            |
| WaiNingKris 2014    | Recruitment challenges facing elderly care service providers in Hong Kong                                                                                                             | Exclusion reason: Data not separating aged care support worker outcomes;                         |
| Wang 2022           | Understanding person-centered dementia care from the perspectives of frontline staff: Challenges, opportunities, and implications for countries with limited long-term care resources | Exclusion reason: Outcomes not related to recruitment or retention of aged care support workers; |
| Wang 2015           | Nurses' Practice Environment and Their Job Satisfaction: A Study on Nurses Caring for Older Adults in Shanghai                                                                        | Exclusion reason: Not including aged care support workers;                                       |
| Yen-Patton 2012     | Nurse and nursing assistant reciprocal caring in long term care: Outcomes of absenteeism, retention, turnover and quality of care                                                     | Exclusion reason: Conference proceedings, dissertation;                                          |
