# Supplementary material for: Factors Impacting Retention of Aged Care Workers: A Systematic Review
Source: Healthcare (Basel). 2023 Nov 21;11(23):3008. doi: 10.3390/healthcare11233008 (PMC10706301; doi:10.3390/healthcare11233008)
Supplement: Supplementary file 1 [file healthcare-11-03008-s001.zip]

Archive with 8 entries (8 files):
- Table S1_ PRISMA_2020_checklist (1).pdf
- Table S2 ENTREQ statement.pdf
- Table S3_Medline search strategy.pdf
- Table S4_Details of interventional studies.pdf
- Table S5_Details of quantitative and mixed methods descriptive studies.pdf
- Table S6_Details of qualitative studies.pdf
- Table S7_Synthesised findings.pdf
- Table S8_reasons for exclusion at full text review.pdf
